# Supplementary material for: Effect of Osmotic Stress on the Growth, Development and Pathogenicity of Setosphaeria turcica
Source: Front Microbiol. 2021 Jul 23;12:706349. doi: 10.3389/fmicb.2021.706349 (PMC8342955; doi:10.3389/fmicb.2021.706349)
Supplement: Supplementary Table 1 — The primers used in this study. [file Table_1.XLSX]

## Sheet: qTR-PCR
Gene name	Transcript ID	Protein ID	Forward	Revese
StFPS1	153214	153061	CCAGTTTTTCTCCGAGTTCA	AGTCGCATAGCCAGTTTCCC
StGPD1	166570	166417	GGCTACAAGCACAAAGTCACAG	ATATACCCACATCTGCACCGTC
StGPP2	1414693	1414540	TGGTAAAGAGATTGGGGTTGCT	AGTCCTTCGGCGTGTTTGATGT
StHOG1	47672	47519	GCAGTGGCTGTCAAGAAGA	CAGACGGTGGAGATCGGTT
StMSN2	101099	100946	TCAAGCAAGGCTGCGAAGG	ACGAGGGGGGCTGAATGTA
StSTE11	158652	158499	CTCTCAGTCCTCGGCCCAGTAC	GCTTTAGCCATTCGCCAACCTT
StPBS2	138151	137998	CCATTATCGAGTGCGCTCTAGG	GCAGGTTGGGGATTTTGTTCAG
Locus ID from Joint Genome Institute：https://genome.jgi.doe.gov/Settu3/Settu3.home.html

## Sheet: hph
	Forward	Revese
HPH-L/HPH-R	CGACAGCGTCTCCGACCTGA	TTCGATGATGCAGCTTGGGCG
StFPS1-UpL/HPH-UpR	TTTCTGCTTGATTCACGACC	GCCACCATACCCACGCCGAA
